# Supplementary material for: Effect of Antioxidants in Medicinal Products on Intestinal Drug Transporters
Source: MDPI journal article supplement (doi:10.3390/pharmaceutics16050647), 2024-05-10
Supplement: s1 [file s1]

**Table S1.** Antioxidant screened for P-gp, BCRP and OATP2B1-mediated uptake inhibition.

| Name                                                     | MW     | Source                                   | Catalog Number  | Structure (SMILES)                                                | LogP  | FDA IID oral limit (mg/day) | %w/w in 500mg oral unit | Max intestinal conc (uM) in 250mL fluid | Maximum Potency per unit dose | *FDA database available? (Y/N) |                                                      |
|----------------------------------------------------------|--------|------------------------------------------|-----------------|-------------------------------------------------------------------|-------|-----------------------------|-------------------------|-----------------------------------------|-------------------------------|--------------------------------|------------------------------------------------------|
| 3,4-dihydroxybenzoic acid                                | 154.12 | Sigma                                    | 37580-25G-F     | <chem>C1=CC(=C(C=C1C(=O)O)O)O</chem>                              | 0.86  | --                          |                         |                                         | --                            | N                              |                                                      |
| Ascorbic acid                                            | 176.12 | Sigma                                    | A92902-100G     | <chem>C(C(C1C(=C(C(=O)O)O)O)O)O</chem>                            | -1.85 | 600                         |                         |                                         | 20mg                          | Y                              |                                                      |
| Ascorbyl palmitate                                       | 414.5  | Sigma                                    | A1968-25G       | <chem>CCCCCCCCCCCCCCC(=O)OCC(C1C(=C(C(=O)O)O)O)O</chem>           | 6     | 12                          | 2                       | 96.5                                    | 12mg                          | Y                              |                                                      |
| Butylated hydroxyanisole (2-tert-Butyl-4-hydroxyanisole) | 180.24 | Sigma                                    | B1253-5G        | <chem>CC(C)(C)C1=C(C=C(C(=C1)O)OC</chem>                          | 3.2   | 8                           | 1.6                     | 178                                     | 2.5mg/ml, 0.07mg              | Y                              |                                                      |
| Butylated hydroxytoluene                                 | 220.35 | Sigma                                    | PHR1117-1G      | <chem>CC1=CC(=C(C(=C1)C(C)(C)C(C)(C)C)C</chem>                    | 5.1   | 3                           |                         |                                         | 0.24mg, 0.19mg/ml             | Y                              |                                                      |
| Anhydrous citric acid                                    | 192.12 | Sigma                                    | C1909-25G       | <chem>C(C(=O)O)C(CC(=O)O)(C(=O)O)O</chem>                         | -1.64 | 840                         |                         |                                         | 9.8mg, 26.03mg/ml, 0.09%w/v   | Y                              |                                                      |
| Sodium metabisulfite                                     | 190.11 | Fisher                                   | S242-500        | <chem>[O-]S(=O)S(=O)(=O)[O-].[Na+].[Na+]</chem>                   | -3.7  | 640                         |                         |                                         | 8mg, 2mg/ml                   | Y                              |                                                      |
| Propyl gallate                                           | 212.2  | TCI Chemicals                            | G0018           | <chem>CCCOC(=O)C1=CC(=C(C(=C1)O)O)O</chem>                        | 1.8   | 7                           |                         |                                         | 0.07mg, 0.2mg/ml              | Y                              |                                                      |
| Sodium thiosulfate, pentahydrate                         | 248.19 | Sigma                                    | 217247-25G      | <chem>O.O.O.O.O.[O-]S(=O)(=S)[O-].[Na+].[Na+]</chem>              | 0.048 |                             |                         |                                         | 20mg, 22mg/ml                 | Y*                             | *pentahydrate not specifically listed                |
| Vitamin E                                                | 430.7  | Sigma                                    | T3251           | <chem>CC1=C(C2=C(CCCC(O2)(C)CCCC(C)CCC(C)CCCC(C)C(=C1O)C)C</chem> | 12.2  | 85                          |                         |                                         | 300mg, 300mg/ml               | Y*                             | *listed as "vitamin e polyethylene glycol succinate" |
| Carsonic acid                                            | 332.4  | Sigma                                    | SIAL-C0609-10MG | <chem>CC1=C(C2=C(CCCC(O2)(C)CCCC(C)CCC(C)CCCC(C)C(=C1O)C)C</chem> | 4.9   | --                          |                         |                                         | --                            | N                              |                                                      |
| Erythorbic acid                                          | 176.12 | SPECTRUM CHEMICALS & LABORATORY PRODUCTS | E1004-100GM     | <chem>C(C(C1C(=C(C(=O)O)O)O)O)O</chem>                            | -1.88 | --                          |                         |                                         | --                            | Y*                             | *listed but no info available                        |
| Caffeic acid                                             | 180.16 | Sigma                                    | C0625-2G        | <chem>C1=CC(=C(C(=C1C(=O)O)O)O</chem>                             | 1.15  | --                          |                         |                                         | --                            | N                              |                                                      |
| Ferulic acid                                             | 194.18 | Thomas Scientific                        | C753K71         | <chem>COC1=C(C(=CC(=C1)C=CC(=O)O)O)O</chem>                       | 1.51  | --                          |                         |                                         | --                            | N                              |                                                      |

|                         |        |                                          |             |                                                                                                     |       |         |                      |    |                                                           |
|-------------------------|--------|------------------------------------------|-------------|-----------------------------------------------------------------------------------------------------|-------|---------|----------------------|----|-----------------------------------------------------------|
| Glycine                 | 75.07  | Sigma                                    | G7126       | C(C(=O)O)N                                                                                          | -3.21 | 400     | 200mg                | Y  |                                                           |
| Lysine                  | 146.19 | Sigma                                    | L5501-1G    | C(CCN)CC(C(=O)O)N                                                                                   | -3.05 | --      | --                   | N* | *no oral forms                                            |
| Histidine               | 155.15 | Sigma                                    | H3751       | C1=C(NC=N1)CC(C(=O)O)N                                                                              | -3.32 |         | 0.76mg, 5mg/ml       |    |                                                           |
| Glutathione             | 307.33 | Sigma                                    | G4251-10G   | C(CC(=O)NC(CS)C(=O)NCC(=O)O)C(C(=O)O)N                                                              | -6.4  | --      | --                   | N  |                                                           |
| Co-enzyme Q-10          | 863.3  | Millipore                                | C9538-100MG | CC1=C(C(=O)C(=C(C1=O)OC)OC)CC=C(C)CCC=C(C)CCC=C(C)CCC=C(C)CCC=C(C)CCC=C(C)CCC=C(C)CCC=C(C)CCC=C(C)C | 10    | --      | --                   | N  |                                                           |
| Carnosine               | 226.23 | Sigma                                    | C9625-10MG  | C1=C(NC=N1)CC(C(=O)O)NC(=O)CCN                                                                      | -4    | --      | --                   | N  |                                                           |
| Ergothioneine           | 229.3  | Sigma                                    | E7521-5MG   | C[N+](C)(C)C(CC1=CN[C@@H]1C(=O)[O-])C(=O)[O-]                                                       | 0.3   | --      | --                   | N  |                                                           |
| Sesamol                 | 138.12 | Sigma                                    | S3003-5G-A  | C1OC2=C(O1)C=C(C=C2)O                                                                               | 1.57  | 2325mg* | 70% v/v*             | N* | *sesame oil has an entry<br>*listed but no info available |
| Methionine              | 149.21 | Sigma                                    | M9625       | CSCCC(C(=O)O)N                                                                                      | -1.87 | --      | --                   | Y* |                                                           |
| Tartaric Acid           | 150.09 | Sigma                                    | T0250       | C(C(C(=O)O)O)(C(=O)O)O                                                                              | -0.76 | 1325    | 10mg                 | Y  |                                                           |
| Phosphoric Acid         | 97.995 | Millipore                                | 466123-25G  | OP(=O)(O)O                                                                                          | -2.1  | 19      | 6.4mg/5ml,<br>0.19mg | Y  |                                                           |
| Cysteine hydrochloride  | 157.62 | SPECTRUM CHEMICALS & LABORATORY PRODUCTS | C1473       | C(C(C(=O)O)N)S.Cl                                                                                   | 2.6   | 50      |                      | Y* | *anhydrous form                                           |
| EDTA (edetate disodium) | 336.21 | Fisher                                   | 17892       | C(C[NH+])(CC(=O)[O-])CC(=O)[O-])[NH+](CC(=O)[O-])CC(=O)[O-].[Na+].[Na+]                             | -2.6  |         | 4mg                  | Y* | *of edetic acid                                           |
| Sorbic acid             | 112.13 | Sigma                                    | S1626       | CC=CC=CC(=O)O                                                                                       | 1.33  | 80      | 0.94mg               | Y  |                                                           |
| Sodium bisulfite        | 104.06 | Sigma                                    | 243973-100G | OS(=O)[O-].[Na+]                                                                                    | -1.2  | 9       | 1mg,<br>0.5mg/ml     | Y  |                                                           |
| Sodium sulfite          | 126.05 | Sigma                                    | 207845      | [O-]S(=O)[O-].[Na+].[Na+]                                                                           | -4    |         | 5mg,<br>1.15mg/ml    | Y  |                                                           |

**Table S2. Comparison of IC<sub>50</sub> values obtained with and without preincubation of the OATP2B1 expressing cells with BHA and AP.** Pre-incubation of the OATP2B1 expressing cells with BHA and AP for 30 minutes did not significantly affect their inhibition potency. Mean  $\pm$  SD of three independent experiments; a two-tailed t-test was applied.

|                                | IC <sub>50</sub> without preincubation | IC <sub>50</sub> with preincubation | Significance       |
|--------------------------------|----------------------------------------|-------------------------------------|--------------------|
| Ascorbyl palmitate (AP)        | 158.6 $\pm$ 65.9                       | 95.0 $\pm$ 11.7                     | No<br>(p = 0.3886) |
| Butylated hydroxyanisole (BHA) | 76.9 $\pm$ 15.9                        | 67.0 $\pm$ 12.8                     | No<br>(p=0.1801)   |

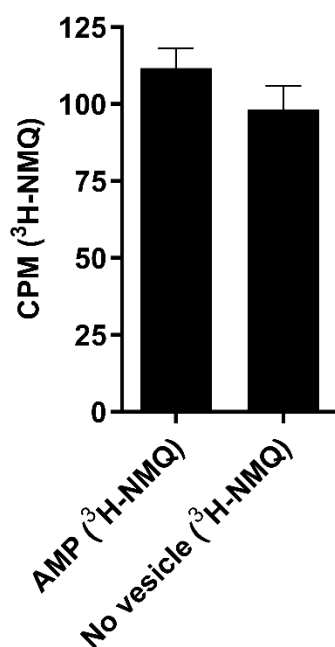

**Figure S1. <sup>3</sup>H-NMQ adsorbs on the filtration plate.** <sup>3</sup>H-NMQ was incubated with or without P-gp membrane vesicles (25  $\mu$ g/well) in the presence of 5 mM AMP. Plates were incubated at 37 °C for 20 min. Each column represents the mean  $\pm$  SD of counts per minute (CPM) of <sup>3</sup>H-NMQ uptake or adsorption.

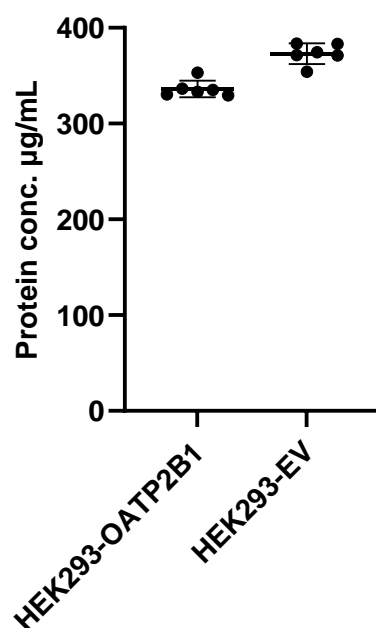

**Figure S2. Protein concentration per well was consistent.** Protein concentration was measured with BCA assay HEK-293 cells expressing OATP2B1 or empty vector. Each column represents the mean  $\pm$  SD of protein concentration  $\mu\text{g/mL}$ .

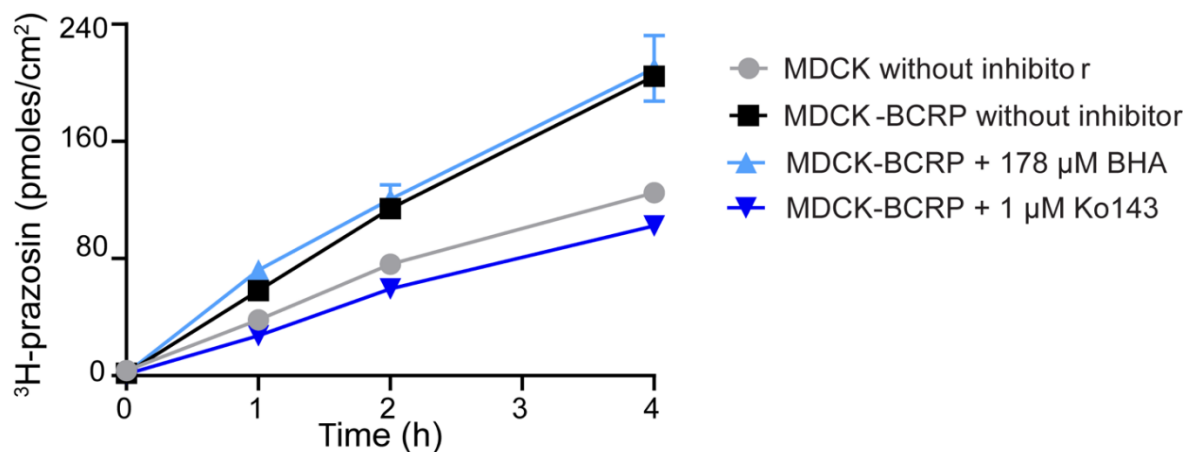

**Figure S3. Effects of Ko 143 or BHA on the efflux of Prazosin by MDCK-hBCRP-cMDR1-KO cells.** The MDCK-hBCRP-cMDR1-KO cell line is a CRISPR-Cas9 engineered MDCK line that expresses human BCRP while lacking the endogenous canine MDR1 (cABCB1). Ko143 (1  $\mu\text{M}$ ) or BHA (178  $\mu\text{M}$ ) was applied to both basal and apical sides of the cells. The control cell line used was MDCK, in which canine MDR1 (cABCB1) has been knocked out. The efflux of  $^3\text{H}$ -prazosin (1  $\mu\text{M}$ ) from the basal to apical side was monitored over a period of 4-hours, both with and without the addition of the compounds to both sides. Data are presented as mean values  $\pm$  SD from one representative experiment.
